# Supplementary material for: BCL2 Expression at Post-Induction and Complete Remission Impact Outcome in Acute Myeloid Leukemia
Source: PubMed Central journal article supplement (PMC7762084; doi:10.3390/diagnostics10121048), 2020-12-04
Supplement: diagnostics-10-01048-s001.pdf [file diagnostics-10-01048-s001.pdf]

### Supplementary material

Supplementary material includes tables with gene expression level information and univariate and multivariate survival analyses. It also includes a figure representing evolution of *BCL2* levels throughout follow up of patients.

**Table S1.** Comparison of *BCL2* expression levels at different points during follow up.

|                             | N <sup>o</sup> | Mean | p-value |
|-----------------------------|----------------|------|---------|
| <b><i>BCL2</i> Dx vs PI</b> | 86*            |      |         |
| Dx                          |                | 1.64 | <0.001  |
| PI                          |                | 0.97 |         |
| <b><i>BCL2</i> Dx vs CR</b> | 64*            |      |         |
| Dx                          |                | 1.57 | <0.001  |
| CR                          |                | 0.95 |         |
| <b><i>BCL2</i> PI vs RL</b> | 23*            |      |         |
| PI                          |                | 1.07 | 0.05    |
| RL                          |                | 2.17 |         |
| <b><i>BCL2</i> CR vs RL</b> | 20*            |      |         |
| CR                          |                | 0.96 | 0.03    |
| RL                          |                | 2.27 |         |

N<sup>o</sup>, number of cases; Dx, diagnosis; PI, post-induction; CR, complete remission; RL, relapse. \*Of the 86 PI, 56 were at CR and 30 had persistent disease. Comparison between groups included the same patients at different time points.

**Table S2.** Dichotomized value of *BCL2* expression level with the area under the ROC curve for overall survival (OS)

| Variable        | OS whole series |           |        |             |             | OS in <70 years and intermediate cytogenetic risk |           |        |             |             |
|-----------------|-----------------|-----------|--------|-------------|-------------|---------------------------------------------------|-----------|--------|-------------|-------------|
|                 | AUC             | 95% CI    | Cutoff | Sensitivity | Specificity | AUC                                               | 95% CI    | Cutoff | Sensitivity | Specificity |
| <i>BCL2</i> -DX | 0.56            | 0.45–0.67 | 0.8095 | 0.79        | 0.40        | 0.53                                              | 0.41–0.67 | 2.030  | 0.84        | 0.33        |
| <i>BCL2</i> -PI | 0.59            | 0.47–0.71 | 1.451  | 0.29        | 0.92        | 0.59                                              | 0.43–0.75 | 1.451  | 0.30        | 0.92        |
| <i>BCL2</i> -CR | 0.59            | 0.45–0.73 | 1.451  | 0.32        | 0.94        | 0.54                                              | 0.35–0.73 | 1.451  | 0.33        | 0.91        |
| <i>BCL2</i> -RL | 0.55            | 0.33–0.77 | 2.148  | 0.32        | 1           | 0.56                                              | 0.27–0.84 | 1.655  | 0.5         | 0.8         |

Dx, diagnosis; PI, post-induction; CR, complete remission; RL, relapse; AUC, area under the ROC curve; OS, overall survival; CI, confidence interval.

**Table S3.** Dichotomized value of *BCL2* expression level with the area under the ROC curve for progression-free survival (PFS)

| Variable        | PFS whole series |           |        |             |             | PFS in <70 years and intermediate cytogenetic risk |           |        |             |             |
|-----------------|------------------|-----------|--------|-------------|-------------|----------------------------------------------------|-----------|--------|-------------|-------------|
|                 | AUC              | 95% CI    | Cutoff | Sensitivity | Specificity | AUC                                                | 95% CI    | Cutoff | Sensitivity | Specificity |
| <i>BCL2</i> -DX | 0.56             | 0.45–0.67 | 5      | 0.79        | 0.40        | 0.54                                               | 0.40–0.68 | 1.534  | 0.64        | 0.55        |
| <i>BCL2</i> -PI | 0.59             | 0.47–0.72 | 2      | 0.47        | 0.76        | 0.58                                               | 0.42–0.75 | 5      | 0.5         | 0.67        |
| <i>BCL2</i> -CR | 0.60             | 0.46–0.74 | 1      | 0.49        | 0.77        | 0.54                                               | 0.35–0.72 | 1.427  | 0.28        | 0.875       |

Dx, diagnosis; PI, post-induction; CR, complete remission; RL, relapse; AUC, area under the ROC curve; OS, overall survival; CI, confidence interval.

**Table S4.** Univariate and multivariate progression-free survival analysis in the whole series at diagnosis (Dx)

| PROGRESSION FREE SURVIVAL |                     |         |           |         |                       |         |           |        |
|---------------------------|---------------------|---------|-----------|---------|-----------------------|---------|-----------|--------|
| Whole series              |                     |         |           |         |                       |         |           |        |
|                           | Univariate analysis |         |           |         | Multivariate analysis |         |           |        |
|                           | Nº                  | HR      | 95% CI    | P       | Nº                    | HR      | 95% CI    | P      |
| <b>Age at Dx</b>          | 160                 | 1.02    | 1.01–1.04 | 0.00076 | 138                   | 1.023   | 1.01–1.04 | <0.001 |
| <b>ELN Risk</b>           |                     |         |           |         |                       |         |           |        |
| Low                       | 150                 | 1 (ref) |           |         | 138                   |         |           |        |
| Intermediate              |                     | 1.20    | 0.71–2.00 | 0.50    |                       | 1 (ref) |           |        |
| High                      |                     | 1.71    | 1.02–2.86 | 0.04    |                       | 1.056   | 0.62–1.81 | 0.842  |
| <b>BCL2-DX</b>            |                     |         |           |         |                       |         |           |        |
| <b>(continuous)</b>       | 147                 | 1.09    | 0.93–1.28 | 0.30    | 138                   |         |           |        |
| <b>BCL2-DX (high*)</b>    | 147                 | 1.63    | 1–2.66    | 0.05    | 138                   | 1.589   | 0.96–2.62 | 0.07   |

ELN, European LeukemiaNet 2010; DX, diagnosis; \* *BCL2* expression above AUC value (dichotomized); HR, hazard ratio; CI, confidence interval.

Supplementary Table S5. Univariate survival analysis.

|                              | Overall Survival     |      |           |          |                                                    |      |           |       | Progression-Free Survival |      |           |         |                                                    |      |           |       |
|------------------------------|----------------------|------|-----------|----------|----------------------------------------------------|------|-----------|-------|---------------------------|------|-----------|---------|----------------------------------------------------|------|-----------|-------|
|                              | Whole series         |      |           |          | Intermediate cytogenetic risk<br>and age <70 years |      |           |       | Whole series              |      |           |         | Intermediate cytogenetic risk<br>and age <70 years |      |           |       |
|                              | N <sup>o</sup>       | HR   | 95% CI    | P        | N <sup>o</sup>                                     | HR   | 95% CI    | P     | N <sup>o</sup>            | HR   | 95% CI    | P       | N <sup>o</sup>                                     | HR   | 95% CI    | P     |
| <b>Age (continuous)</b>      | 176                  | 1.04 | 1.02–1.05 | 0.000002 | 98                                                 | 1.02 | 1–1.05    | 0.059 | 160                       | 1.02 | 1.01–1.04 | 0.00076 | 91                                                 | 1.01 | 0.99–1.04 | 0.22  |
| <b>ELN risk</b>              | 160                  |      |           |          | 93                                                 |      |           |       | 150                       |      |           |         | 87                                                 |      |           |       |
| Low                          | 1 (ref)              |      |           |          |                                                    |      |           |       | 1 (ref)                   |      |           |         |                                                    |      |           |       |
| Intermediate                 | 1.53 0.89–2.61 0.12  |      |           |          |                                                    |      |           |       | 1.20 0.71–2.00 0.50       |      |           |         |                                                    |      |           |       |
| High                         | 2.10 1.22–3.62 0.008 |      |           |          |                                                    |      |           |       | 1.71 1.02–2.86 0.04       |      |           |         |                                                    |      |           |       |
| <b>BCL2- PI (continuous)</b> | 91                   | 1.45 | 1.01–2.07 | 0.046    | 52                                                 | 1.63 | 1.04–2.57 | 0.035 | 91                        | 1.39 | 0.99–1.97 | 0.06    | 52                                                 | 1.48 | 0.97–2.25 | 0.069 |
| <b>BCL2- PI (high)*</b>      | 91                   | 1.94 | 1.08–3.49 | 0.026    | 52                                                 | 2.44 | 1.06–5.64 | 0.037 | 91                        | 1.55 | 0.94–2.56 | 0.087   | 52                                                 | 1.48 | 0.75–2.92 | 0.26  |
| <b>BCL2-CR (continuous)</b>  | 67                   | 1.83 | 1.14–2.95 | 0.012    | 41                                                 | 1.54 | 0.85–2.77 | 0.15  | 67                        | 1.63 | 1.07–2.49 | 0.022   | 41                                                 | 1.35 | 0.81–2.28 | 0.25  |
| <b>BCL2- CR (high)*</b>      | 67                   | 3.04 | 1.45–6.36 | 0.0033   | 41                                                 | 2.71 | 1–7.33    | 0.049 | 67                        | 2.06 | 1.11–3.85 | 0.023   | 41                                                 | 1.97 | 0.81–4.79 | 0.14  |
| <b>BCL2-RL (continuous)</b>  | 30                   | 1.11 | 0.97–1.27 | 0.12     | 19                                                 | 1.15 | 1–1.32    | 0.05  | 30                        | 1.08 | 0.95–1.22 | 0.24    | 19                                                 | 1.09 | 0.98–1.22 | 0.12  |
| <b>BCL2- RL (high)*</b>      | 30                   | 1.22 | 0.52–2.85 | 0.65     | 19                                                 | 1.72 | 0.59–4.99 | 0.32  |                           |      |           |         |                                                    |      |           |       |

ELN, European LeukemiaNet; HR, hazard ratio; N<sup>o</sup>, number of cases; *BCL2-PI*, *BCL2* levels at post-induction; *BCL2-CR*, *BCL2* levels at complete remission; *BCL2-RL*, *BCL2* levels at relapse; CI, Confidence Interval; P, p-value; \* expression above AUC value (dichotomized)

**Supplementary Figure S1.** Correspondence between protein levels (A) via Western blot and mRNA levels (B) via QRT-PCR. Protein quantification (C) using ImageJ software. The images in (A) are taken from two different blots; the samples were derived from the same experiment and the blots were processed in parallel.

**A)**

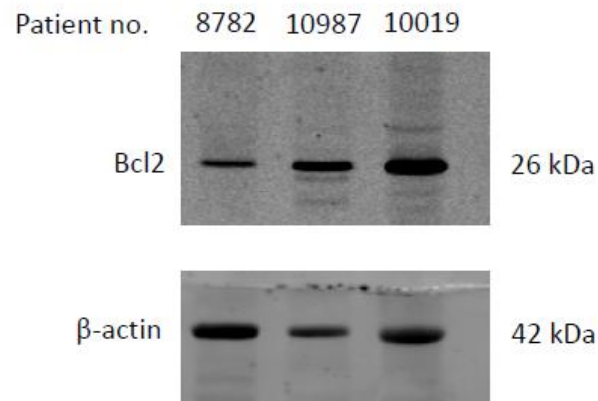

**B)**

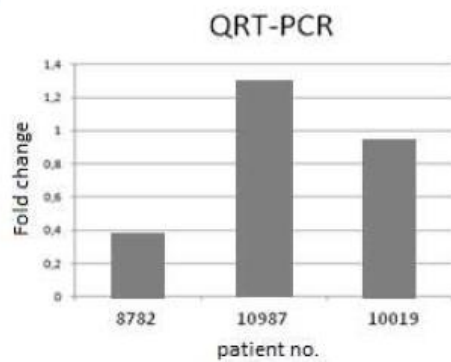

**C)**

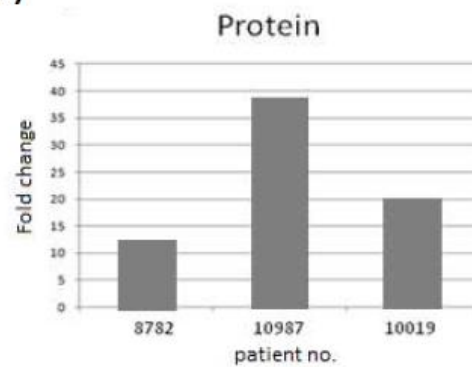

**Supplementary Figure S2.** Evolution of *BCL2* levels in 18 individual patients with follow up  
*BCL2* values available at diagnosis (Dx), complete remission (CR) and relapse (RL)\*.

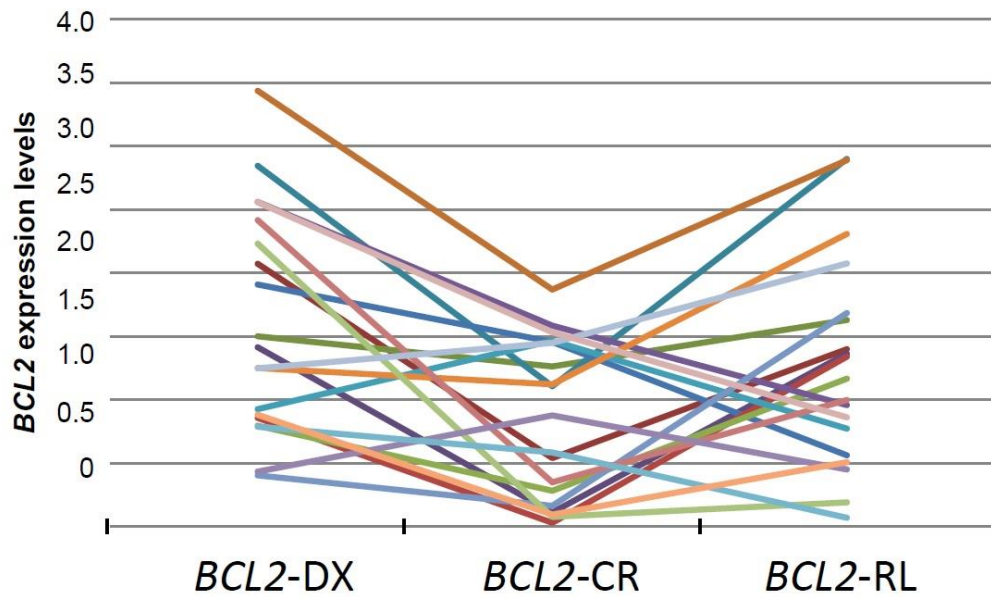

\*Follow-up samples at three time points were only available for 23 patients and, of them, 18 patients were in CR at PI; therefore, we included only *BCL2*-CR levels.
